# Supplementary material
Source: publisher site journal article supplement (https://www.spandidos-publications.com/5907/downloadSupplementary)

Figure S1. Flowchart of the literature screening, classification and summarization of the literature for the present review.

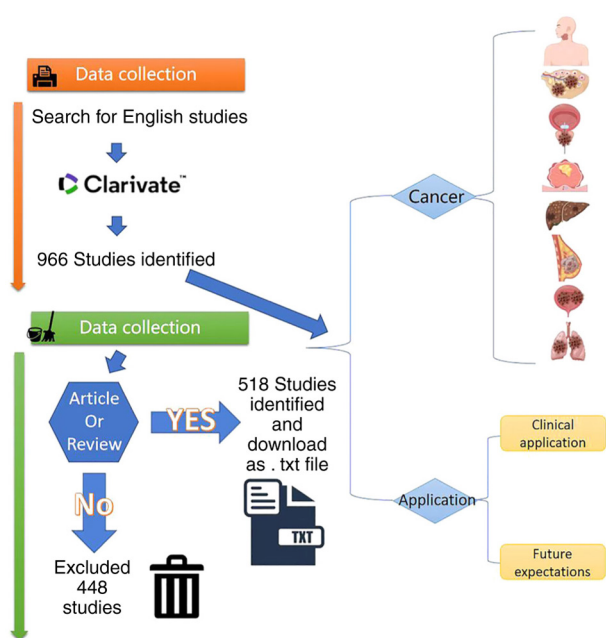

Supplement: Supplementary file 1 [file downloadSupplementary]
